# Supplementary material
Source: Springer Nature journal article supplement (https://www.springermedizin.de/resource/supplementary/12968_2008_17_MOESM3_ESM.pdf/9577796)

**(a)**

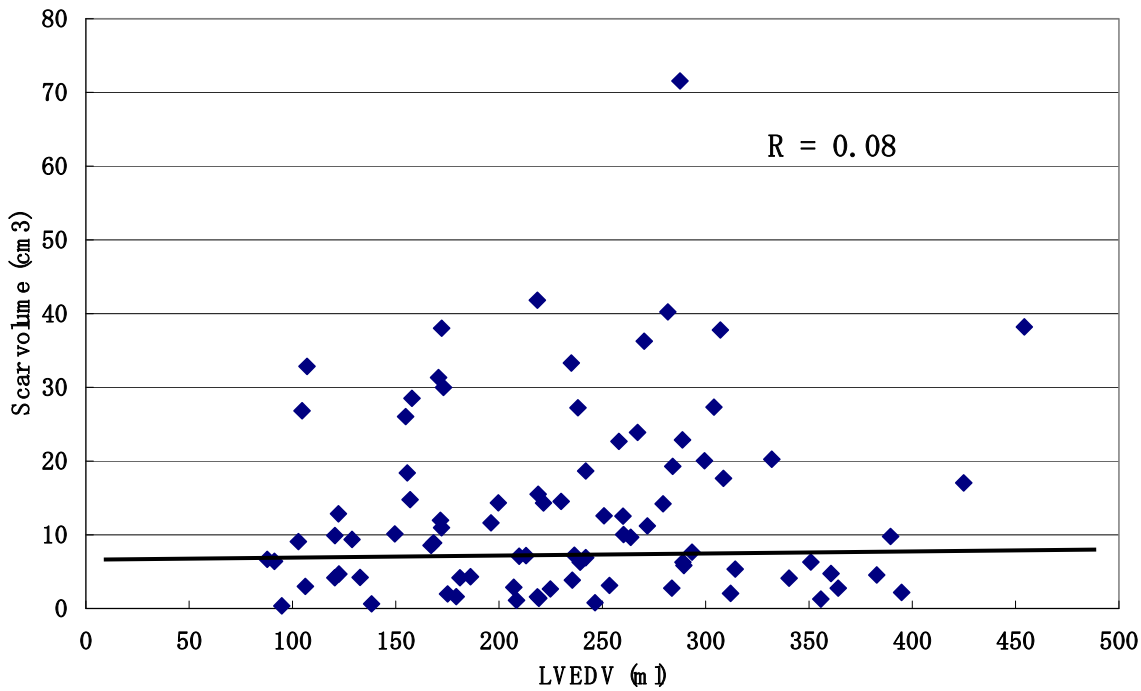

**(b)**

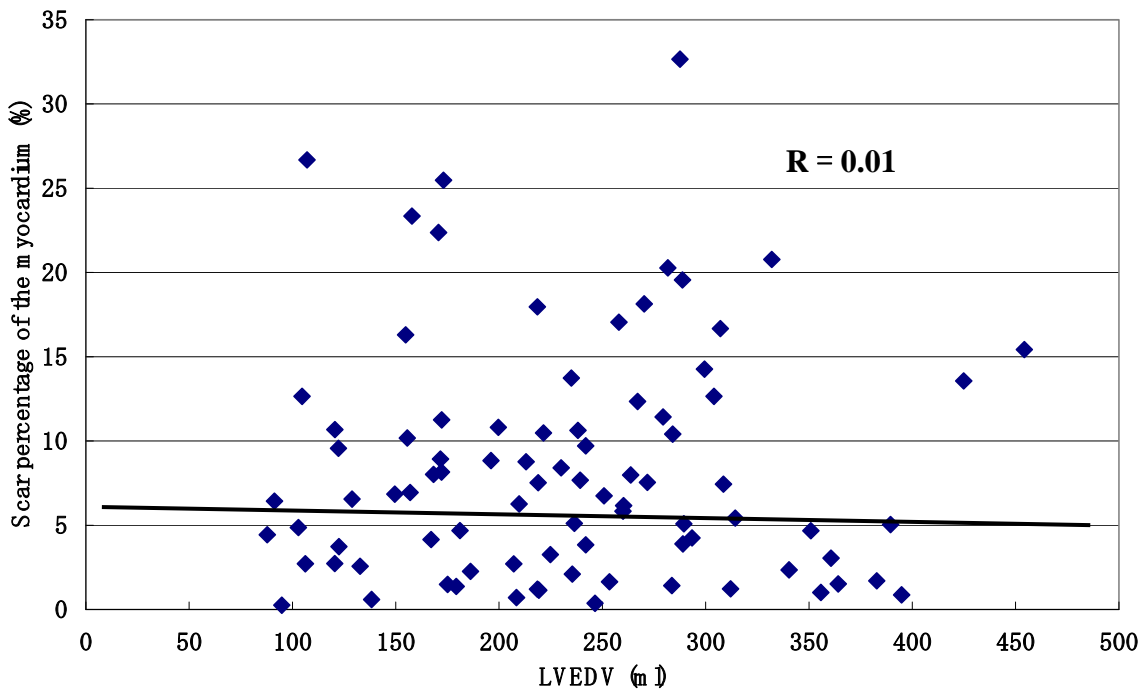

Supplement: MOESM3 [file 9577796]
